# Supplementary material for: Longitudinal and Quantitative Fecal Shedding Dynamics of SARS-CoV-2, Pepper Mild Mottle Virus and CrAssphage
Source: bioRxiv or medRxiv preprint supplement (doi:10.1101/2023.02.02.23285391), 2023-02-07
Supplement: Supplementary file [file media-1.pdf]

# Supplementary Information

Table S1: Cohort Demographic Data

|                                  | Number (N = 48) | Percent |
|----------------------------------|-----------------|---------|
| <b>Sex</b>                       |                 |         |
| Male                             | 21              | 43.75   |
| Female                           | 27              | 56.25   |
| <b>Age</b>                       |                 |         |
| 1-17                             | 4               | 8.3     |
| 19-54                            | 36              | 75      |
| 55-70                            | 8               | 16.7    |
| <b>Race/Ethnicity</b>            |                 |         |
| White                            | 18              | 37.5    |
| Asian                            | 13              | 27      |
| Hispanic/Latino                  | 12              | 25      |
| Black/African American           | 2               | 4.2     |
| American Indian or Alaska Native | 1               | 2.1     |
| Pacific Islander/Native Hawaiian | 1               | 2.1     |
| Declined to Answer               | 1               | 2.1     |

Table S2: Individual target gene ddPCR operating parameters and primer and probe sequences

| Target Gene     | Primer Sequence                                                                                        | Cycling Conditions                                                                     | Amplicon Size | Reference            |
|-----------------|--------------------------------------------------------------------------------------------------------|----------------------------------------------------------------------------------------|---------------|----------------------|
| SARS-CoV-2<br>N | Fw: CATTACGTTTGGTGGACCCT<br>Rv: CCTTGCCATGTTGAGTGAGA<br>Probe: CGCGATCAAACAACGTCGG<br>5'FAM/ZEN/3'IBFQ | 50C - 60min<br>95C - 5min<br>[95C - 30s<br>56C - 1min] x40<br>98C - 10min<br>4C - Hold | 143 bp        | Wolfe et al.<br>2021 |

|                      |                                                                                                                     |                                                                                        |        |                         |
|----------------------|---------------------------------------------------------------------------------------------------------------------|----------------------------------------------------------------------------------------|--------|-------------------------|
| SARS-CoV 2<br>ORF1a  | Fw: CAGAAGTGAACACCTTGT<br>Rv: TACAGTTGAATTGGCAGGCA<br>Probe: TGCCACAGTACGTCTACAAGC<br>5'HEX/ZEN/3'IBFQ              | 50C - 60min<br>95C - 5min<br>[95C - 30s<br>56C - 1min] x40<br>98C - 10min<br>4C - Hold | 179 bp | Wolfe et al.<br>2021    |
| BCoV                 | Fw: CTGGAAGTTGGTGGAGTT<br>Rv: ATTATCGGCCTAACATACATC<br>Probe: CCTTCATATCTATACACATCAAGTTGTT<br>5'FAM/ZEN/3'IBFQ      | 50C - 60min<br>95C - 5min<br>[95C - 30s<br>56C - 1min] x40<br>98C - 10min<br>4C - Hold | 85 bp  | Wolfe et al.<br>2021    |
| PMMoV                | Fw: GAGTGGTTTGACCTTAACGTTTGA<br>Rv: TTGTCGGTTGCAATGCAAGT<br>Probe: CCTACCGAAGCAAATG<br>5'HEX/ZEN/3'IBFQ             | 50C - 60min<br>95C - 5min<br>[95C - 30s<br>56C - 1min] x40<br>98C - 10min<br>4C - Hold | 68 bp  | Wolfe et al.<br>2021    |
| CrAssphage<br>CPQ064 | Fw: TGTATAGATGCTGCTGCAACTGTACTC<br>Rv: CGTTGTTTCATCTTTATCTTGCCAT<br>Probe: CTGAAATTGTTTATAAGCAA<br>5'FAM/ZEN/3'IBFQ | 95C - 5 min<br>[95C - 30s<br>56C - 1min] x40<br>98C - 10min<br>4C - Hold               | 126 bp | Stachler et<br>al. 2017 |

Table S3: Estimates derived from logistic regression of SARS-CoV-2 fecal shedding prevalence for an outcome variable of log<sub>10</sub>(gc/mg-dw)

| Random Effects          |             |          |            |         |          |
|-------------------------|-------------|----------|------------|---------|----------|
| Groups                  | Name        | Variance | Std. Dev   |         |          |
| ID                      | (Intercept) | 13.24    | 3.638      |         |          |
| Fixed Effects           |             |          |            |         |          |
| Name                    | Type        | Estimate | Std. Error | z-value | p-value  |
| Intercept               |             | 2.81747  | 0.94748    | 2.974   | 0.00294  |
| Day after symptom onset | Continuous  | -0.22399 | 0.03611    | -6.204  | 5.52e-10 |
| Sex = Male              | Binary      | 0.14498  | 1.22669    | 0.118   | 0.90592  |
|                         |             |          |            |         |          |

Table S4: Estimates derived from linear regression of concentrations of PMMoV and crAssphage fecal shedding for an outcome variable of log10(gc/mg-dw).

|                                           |             |                 |                   |           |                |                |
|-------------------------------------------|-------------|-----------------|-------------------|-----------|----------------|----------------|
| <b>crAssphage</b>                         |             |                 |                   |           |                |                |
| <b>Random Effects</b>                     |             |                 |                   |           |                |                |
| <b>Groups</b>                             | <b>Name</b> | <b>Variance</b> | <b>Std. Dev</b>   |           |                |                |
| <b>ID</b>                                 | (Intercept) | 4.6816          | 2.1637            |           |                |                |
| <b>Residual</b>                           |             | 0.4219          | 0.6495            |           |                |                |
| <b>Fixed Effects</b>                      |             |                 |                   |           |                |                |
| <b>Name</b>                               | <b>Type</b> | <b>Estimate</b> | <b>Std. Error</b> | <b>df</b> | <b>t-value</b> | <b>p-value</b> |
| <b>Intercept</b>                          |             | 2.70163         | 0.44172           | 55.18068  | 6.116          | 1.03e-07       |
| <b>Sex = Male</b>                         | Binary      | -0.51143        | 0.63581           | 45.44786  | -0.804         | 0.425          |
| <b>Positive SARS-CoV-2 Fecal Shedding</b> | Binary      | 0.09748         | 0.10196           | 318.64308 | 0.956          | 0.340          |
| <b>log10(PMMoV_conc</b>                   | Continuous  | 0.02513         | 0.02587           | 312.35886 | 0.971          | 0.332          |
| <b>PMMoV</b>                              |             |                 |                   |           |                |                |
| <b>Random Effects</b>                     |             |                 |                   |           |                |                |
| <b>Groups</b>                             | <b>Name</b> | <b>Variance</b> | <b>Std. Dev</b>   |           |                |                |
| <b>ID</b>                                 | (Intercept) | 0.6787          | 0.8238            |           |                |                |
| <b>Residual</b>                           |             | 2.0021          | 1.4149            |           |                |                |
| <b>Fixed Effects</b>                      |             |                 |                   |           |                |                |
| <b>Name</b>                               | <b>Type</b> | <b>Estimate</b> | <b>Std. Error</b> | <b>df</b> | <b>t-value</b> | <b>p-value</b> |

|                                           |            |          |         |           |        |        |
|-------------------------------------------|------------|----------|---------|-----------|--------|--------|
| <b>Intercept</b>                          |            | 4.78069  | 0.27345 | 64.19427  | 17.483 | <2e-16 |
| <b>Sex = Male</b>                         | Binary     | -0.02717 | 0.29561 | 45.30766  | -0.092 | 0.927  |
| <b>Positive SARS-CoV-2 Fecal Shedding</b> | Binary     | 0.07691  | 0.19406 | 313.24624 | 0.396  | 0.692  |
| <b>log10(crAss_conc)</b>                  | Continuous | 0.00974  | 0.06179 | 88.00628  | 0.158  | 0.875  |

Equation S1: Calculation converting the ddPCR generated concentration of gc/ $\mu$ L extract to gc/mg-dw.

$$\begin{aligned}
 & \frac{\text{Gene Copies}}{\text{mg dry weight stool}} \\
 &= \frac{\text{Gene Copies}}{\mu\text{L Reaction}} \times \frac{22 \mu\text{L Reaction}}{5.5 \mu\text{L RNA Extract}} \times \frac{100 \mu\text{L RNA Extract}}{300 \mu\text{L Homogenate}} \\
 & \times \frac{1200 \mu\text{L Homogenate}}{\text{mg Stool}} \times \frac{\text{mg stool}}{\text{mg dry weight stool}}
 \end{aligned}$$

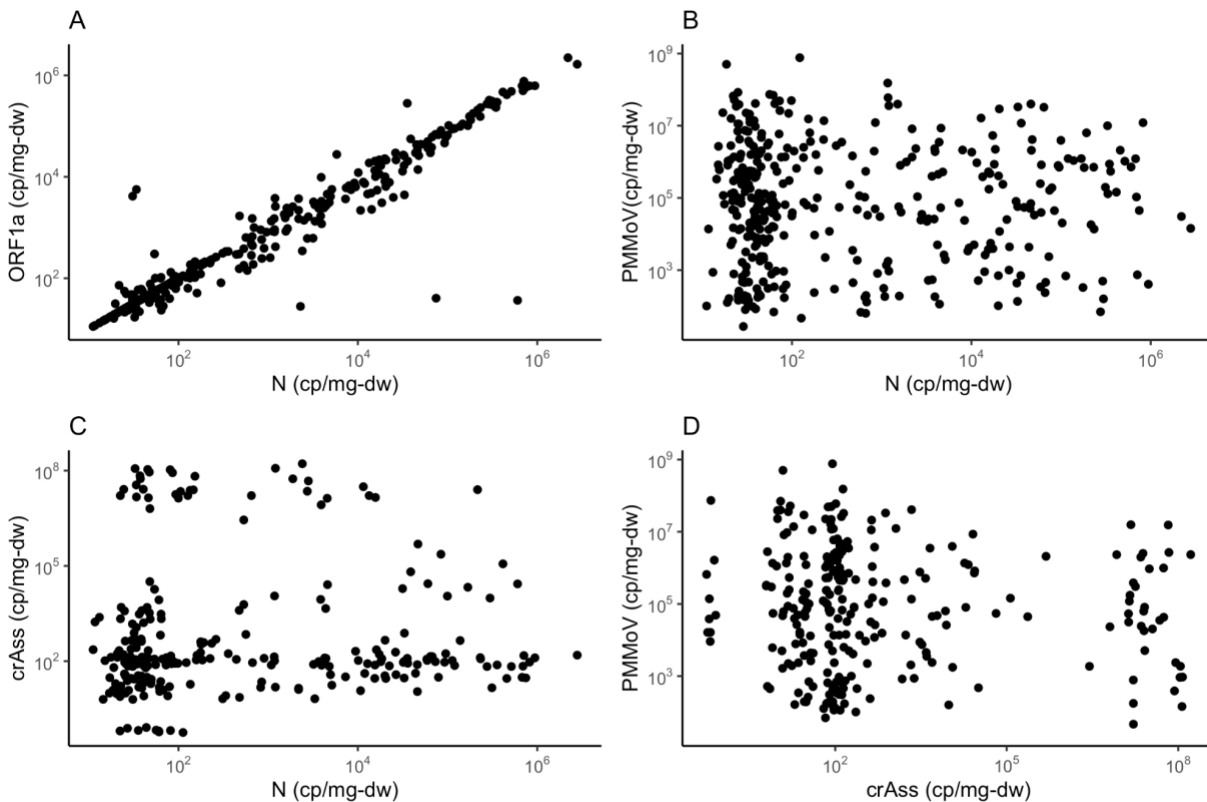

S1. Plots showing correlations between the different gene targets investigated in this study. A) SARS-CoV-2 N vs ORF1a, B) N vs PMMoV, C) N vs. crAss, D) crAss vs PMMoV

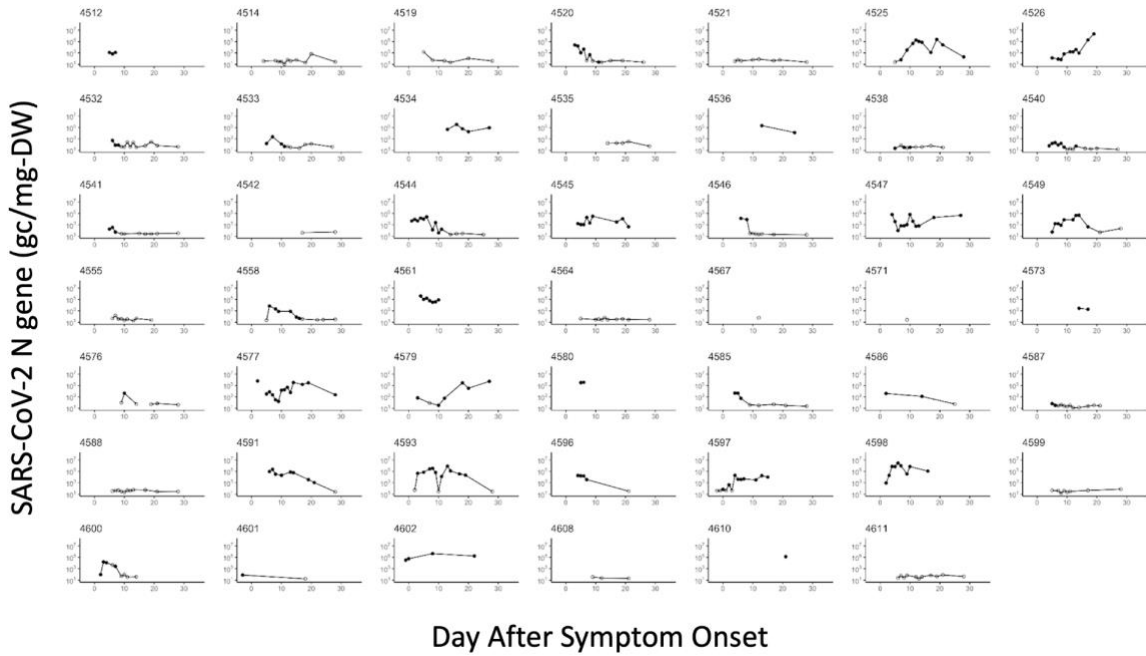

Figure S2. Individual SARS-CoV-2 Trajectories

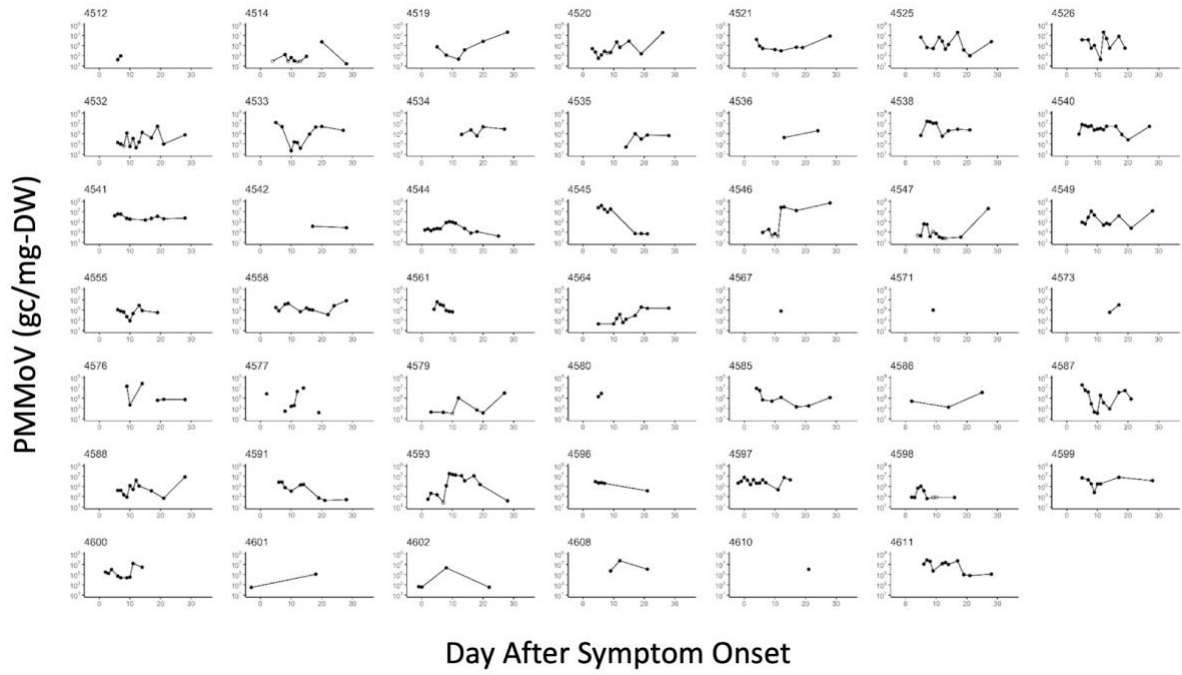

Figure S3: Individual PMMoV shedding trajectories

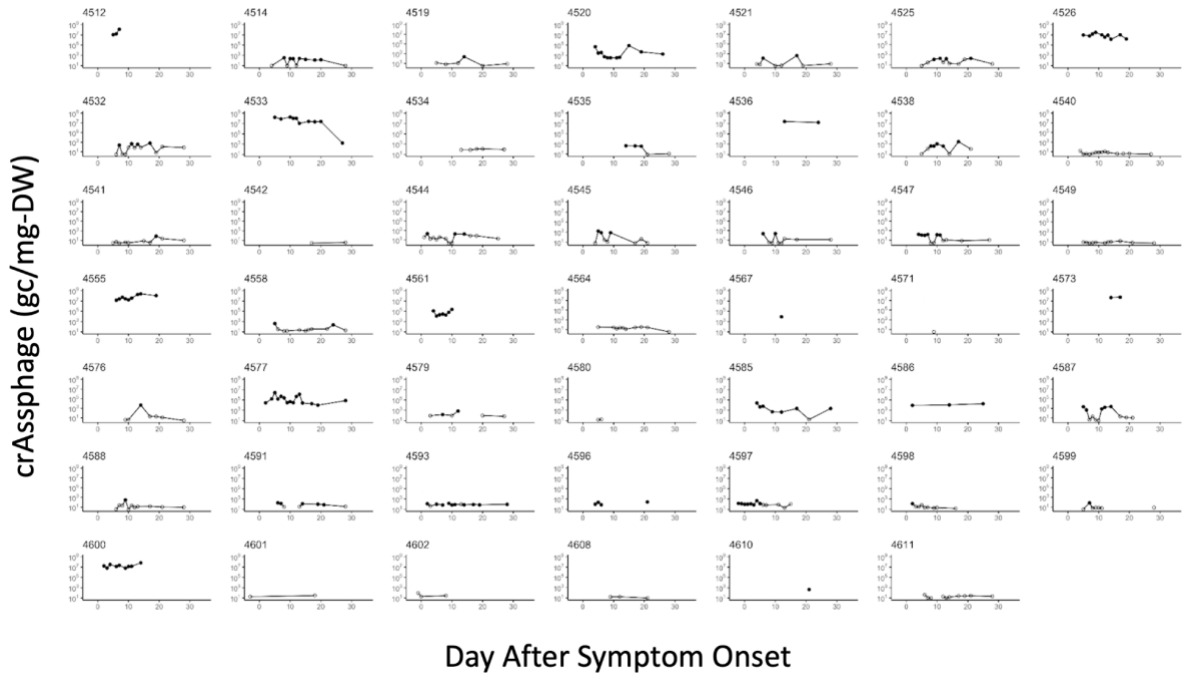

Figure S4. Individual crAsphage shedding trajectories

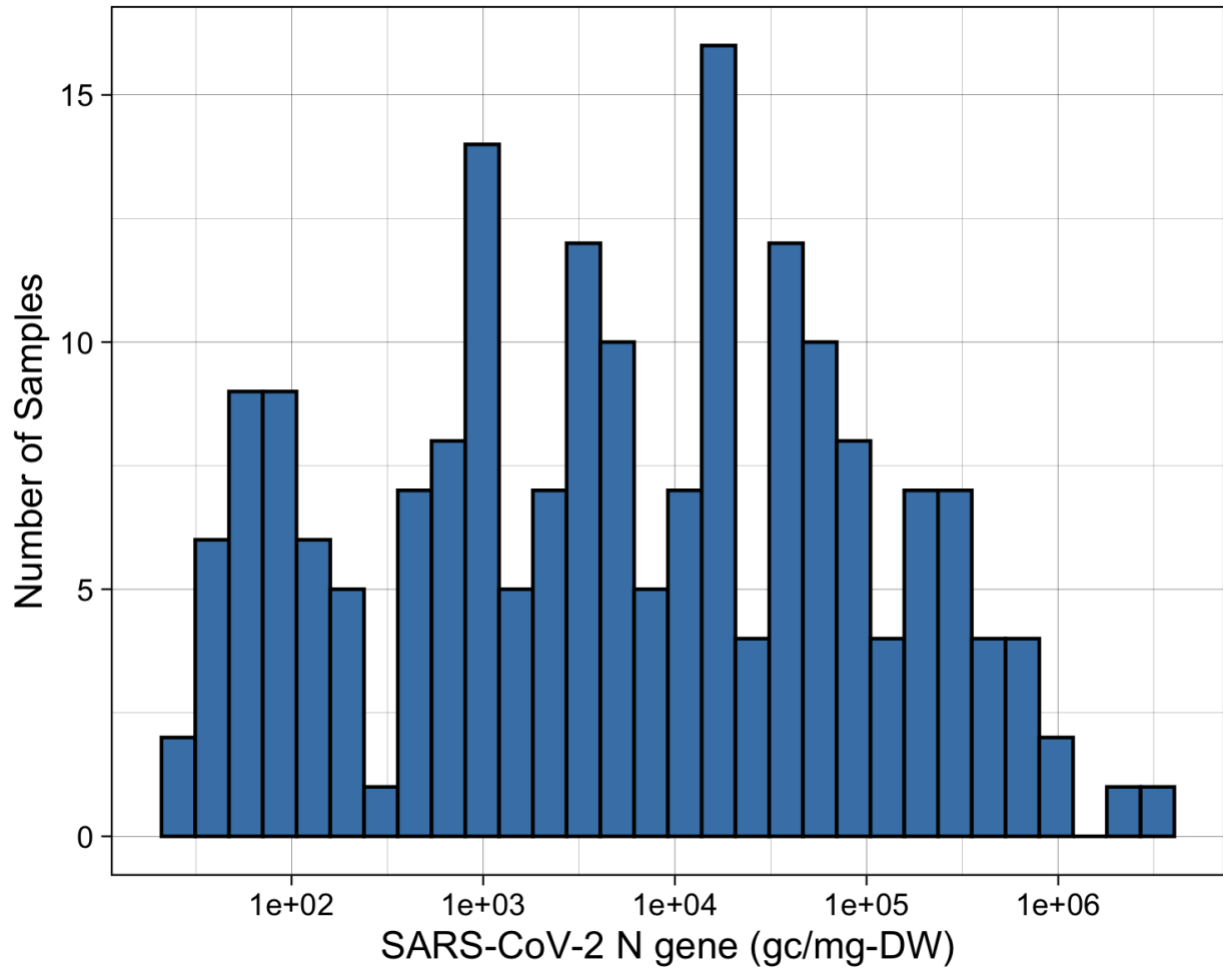

S5: Histogram showing the distribution of all above-LOB SARS-CoV-2 nucleocapsid gene measurements.

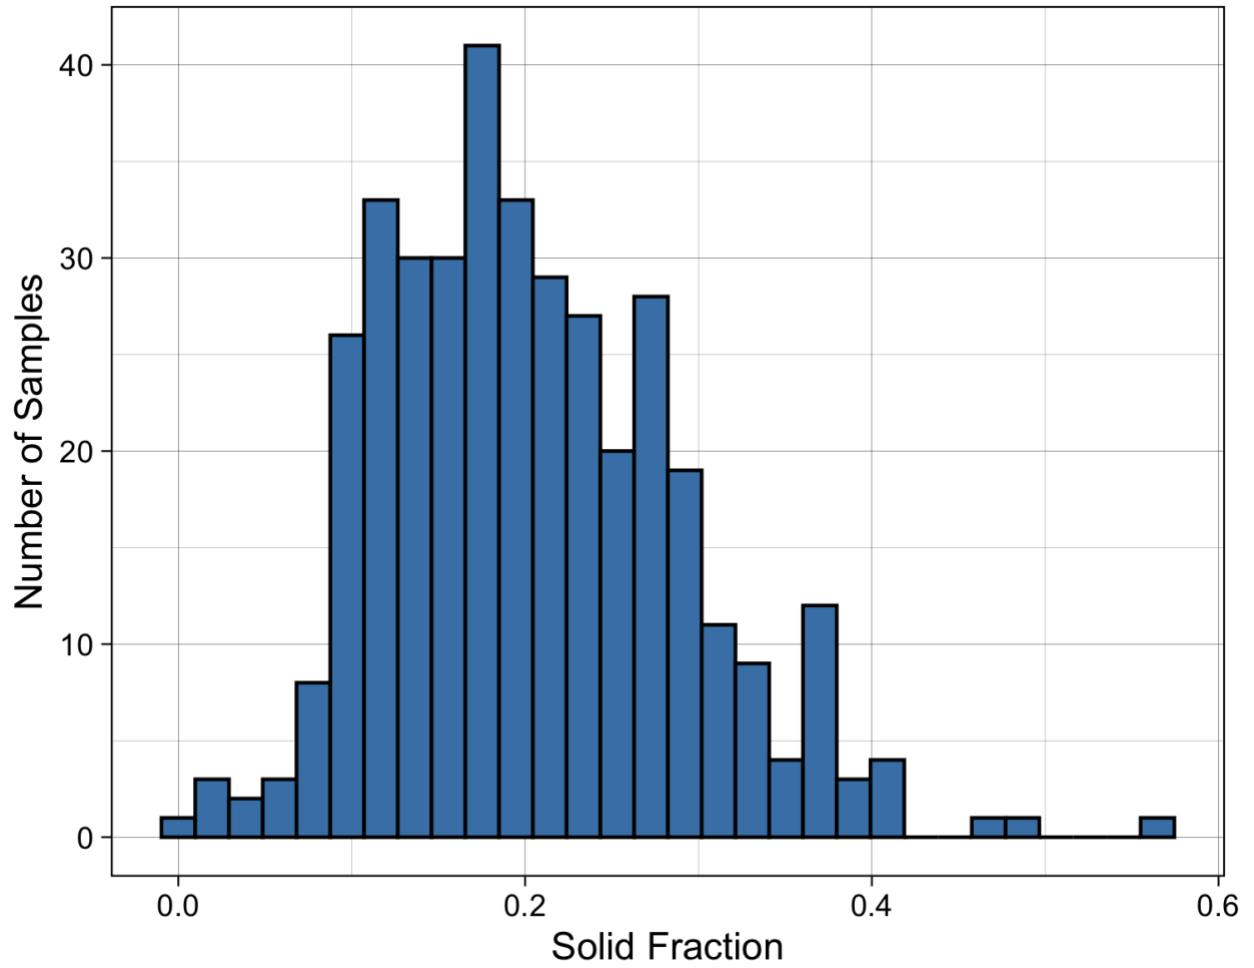

Figure S6: Histogram of the distribution of the solid fraction of all stool samples measured.



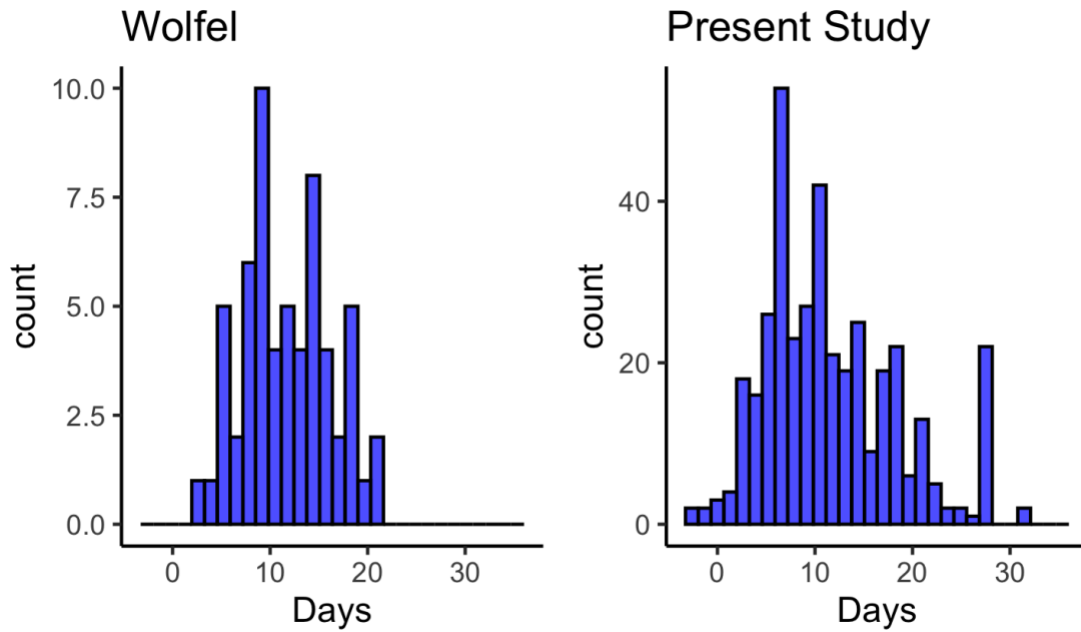

Figure S7: Histogram comparing the sampling coverage (post symptom onset) between Wölfel et al 2020, and the present study.

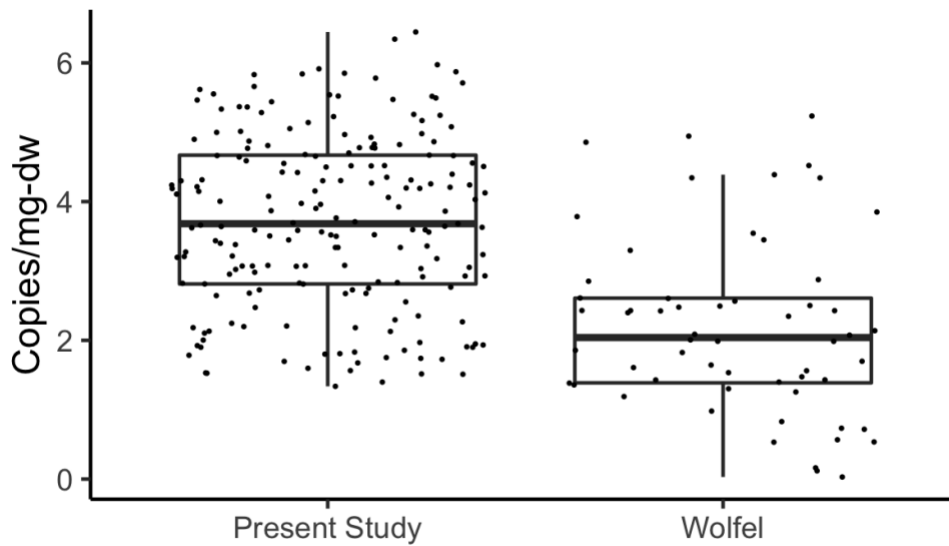

Figure S8: Comparison of the magnitudes of all positive measurements collected from this study with those collected in Wölfel et al 2020, assuming 20% dry mass samples.

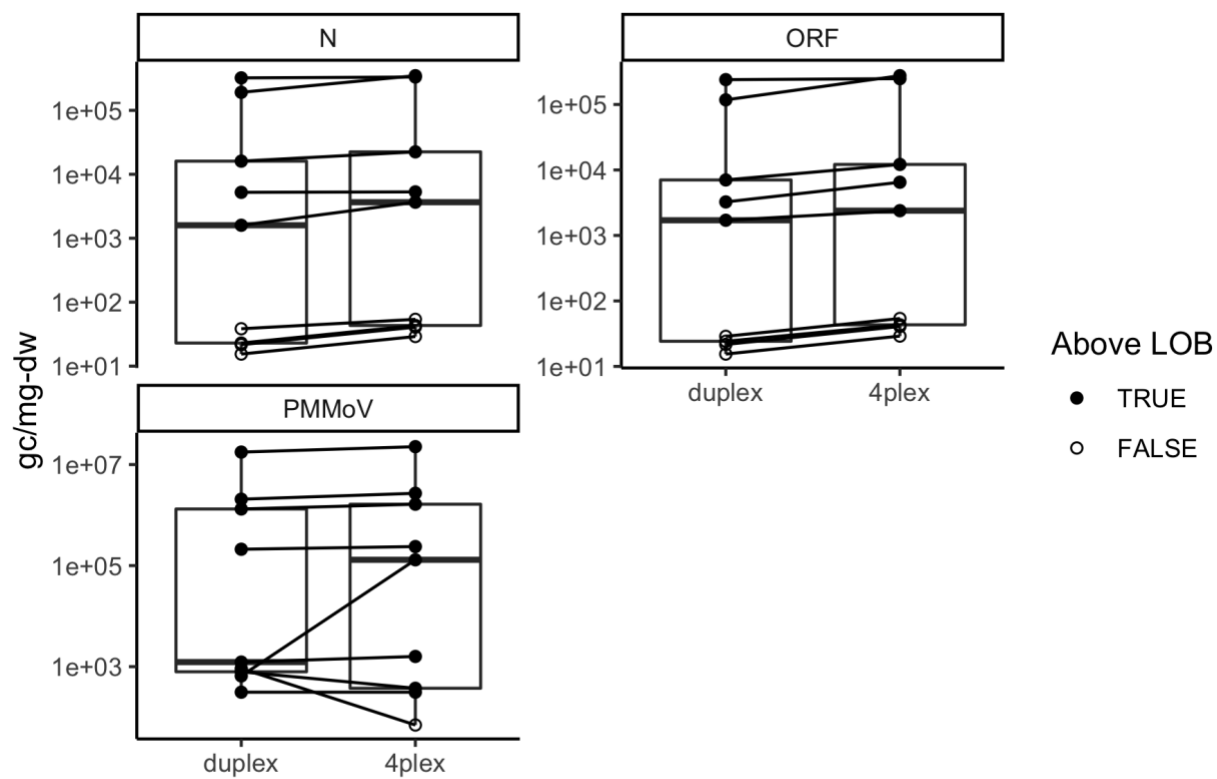

Figure S9: Side-by-side comparison of the RT-ddPCR 4plex assay with two duplex assays for the targets of interest.

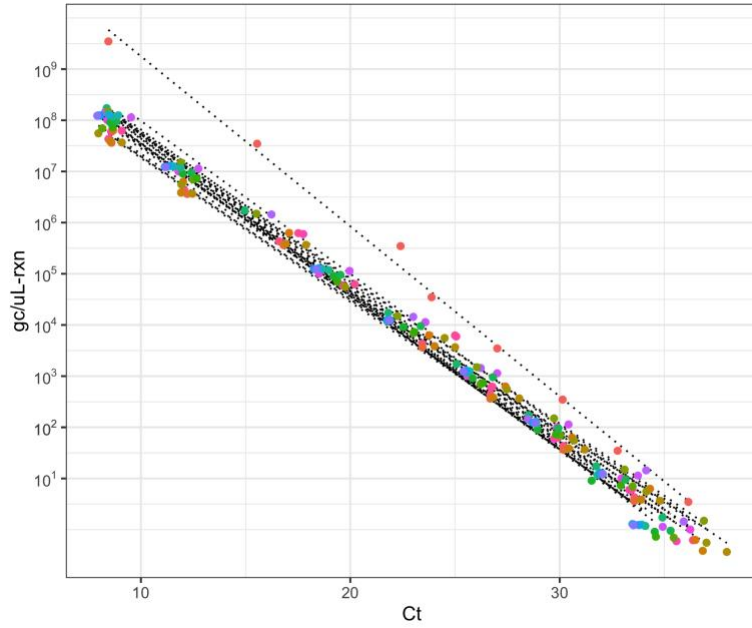

Figure S10: Standard curves correlating the Ct of crAssphage gene fragment dilutions as measured by qPCR to gene copies per microliter of reaction, measured by ddPCR.

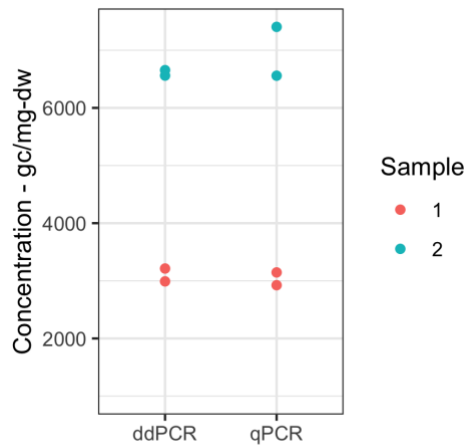

Figure S11: Comparison of quantified concentration of crAssphage positive stool samples from ddPCR vs qPCR with a ddPCR quantified standard curve. For each sample, extraction duplicates were measured using each method.

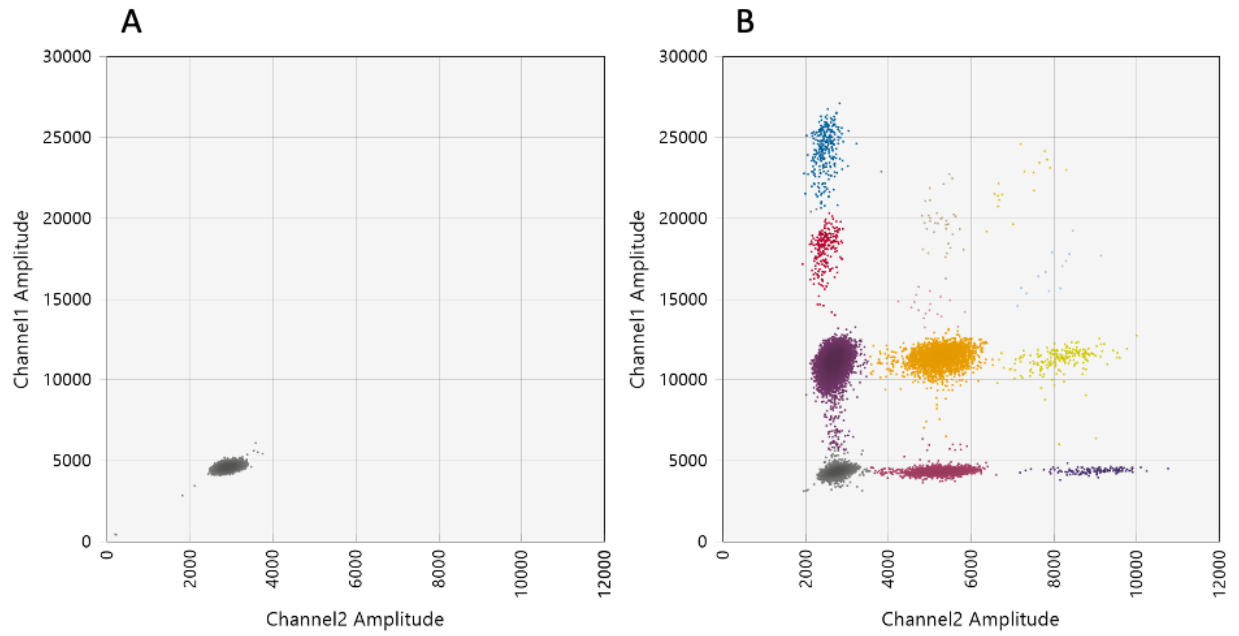

Figure S12: Examples of negative (A), and positive (B) samples measured by the 4 multiplexed ddPCR assay. The positive example exhibits a sample that was positive for all 4 targets.
